# Supplementary figures and images for: Nematic shells: new insights in topology- and curvature-induced effects
Source: Royal Society of Chemistry journal article supplement (doi:10.1039/d1sm00719j), 2021-01-01

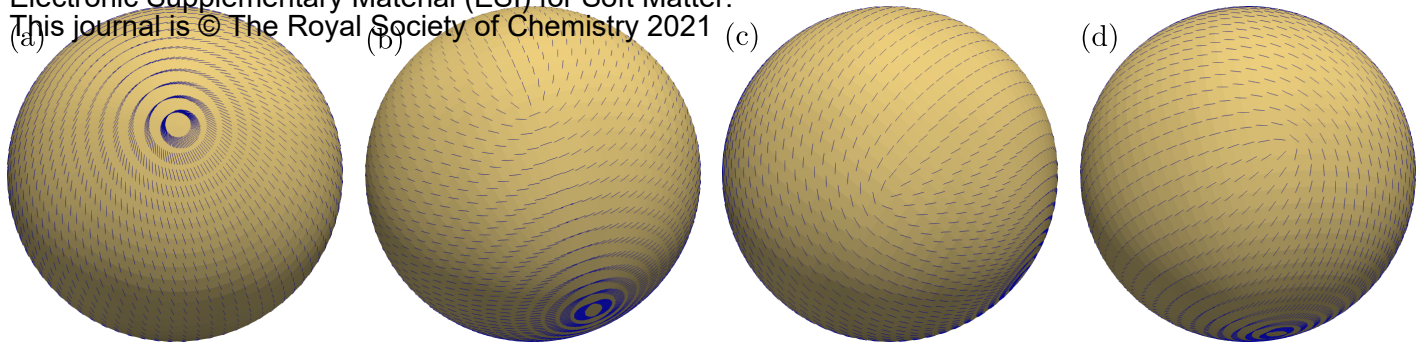

(e)  $q_1$  (longitudinal)

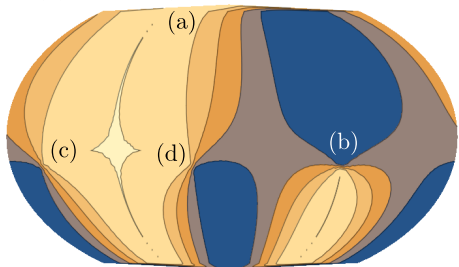

(f)  $q_2$  (colatitudinal)

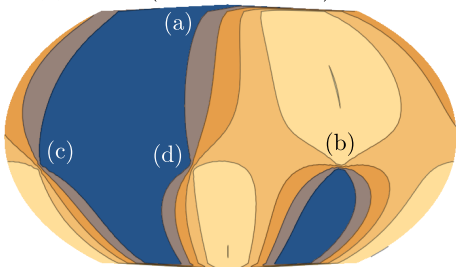

(g)  $q_3$  (radial)

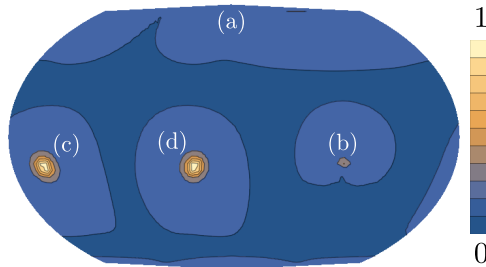

Supplement: d1sm00719j3.pdf [file d1sm00719j3.pdf]

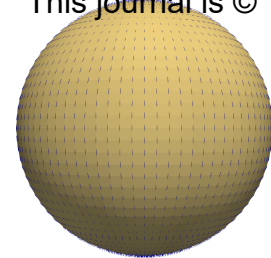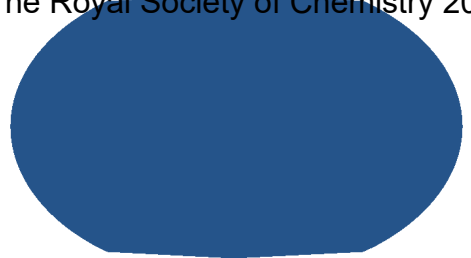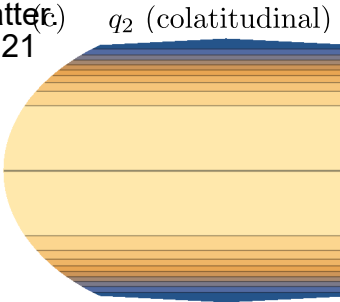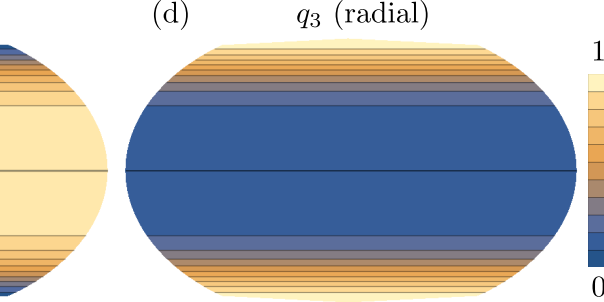

Supplement: d1sm00719j5.pdf [file d1sm00719j5.pdf]
